# Supplementary material for: China’s plastic import ban increases prospects of environmental impact mitigation of plastic waste trade flow worldwide
Source: PubMed Central journal article supplement (PMC7813828; doi:10.1038/s41467-020-20741-9), 2021-01-18
Supplement: 41467_2020_20741_MOESM1_ESM.pdf [file 41467_2020_20741_MOESM1_ESM.pdf]

# China's plastic import ban increases prospects of environmental impact mitigation of plastic waste trade flow worldwide

Zongguo Wen <sup>a,\*</sup>, Yiling Xie <sup>a</sup>, Muhan Chen, Christian Dinga Doh <sup>a</sup>

<sup>a</sup> State Key Joint Laboratory of Environment Simulation and Pollution Control (SKLESPC), School of Environment, Tsinghua University, Beijing, 100084, China

## Supplementary Information

### Table

Supplementary Table 1. The trade flows of global plastic waste market from Comtrade in Baseline Scenario (Unit: t). (Corresponding to Figure 1.)

| <i>Exporter</i> / <i>Importer</i> |             | China    | HK         | Japan     | USA       | Europe 7  |           |           |          |          |          | Southeast Asia 5 |           |           |           |           | Rep. of Korea | Mexico    |             |
|-----------------------------------|-------------|----------|------------|-----------|-----------|-----------|-----------|-----------|----------|----------|----------|------------------|-----------|-----------|-----------|-----------|---------------|-----------|-------------|
|                                   |             |          |            |           |           | Germany   | UK        | Belgium   | Spain    | Italy    | France   | Netherlands      | Thailand  | Indonesia | Viet Nam  | Malaysia  |               |           | Philippines |
| China                             |             | -        | 3184175.95 | 886254.83 | 923632.15 | 646162.82 | 250897.51 | 156735.41 | 94609.23 | 65512.82 | 94057.74 | 75735.84         | 179284.22 | 135518.06 | 144236.28 | 112363.75 | 78434.85      | 169200.67 | 176279.98   |
| HK                                |             | 1596.15  | -          | 565702.33 | 617155.36 | 218161.42 | 314871.38 | 102921.61 | 64400.91 | 28945.86 | 74226.33 | 83014.33         | 42709.20  | 6031.62   | 2564.16   | 29802.23  | 7324.76       | 23130.29  | 80515.24    |
| Japan                             |             | 166.73   | 291.84     | -         | 1022.78   | 41.42     | 131.32    | 22.30     | 66.07    | 19.04    | 18.29    | 19.88            | 407.93    | 37.62     | 342.91    | 129.98    | 187.41        | 485.02    | 32.08       |
| USA                               |             | 11205.60 | 253.44     | 1464.73   | -         | 17088.81  | 865.05    | 7240.96   | 574.81   | 9101.83  | 1937.62  | 740.24           | 3190.17   | 428.80    | 83.97     | 145.35    | 0.00          | 60.80     | 196139.03   |
| Europe 7                          | Germany     | 65.40    | 16.13      | 52.89     | 444.71    | -         | 21886.17  | 12690.01  | 4538.03  | 17219.74 | 52637.83 | 56769.02         | 14.43     | 6.95      | 5.74      | 10.43     | 0.00          | 5.68      | 208.77      |
|                                   | UK          | 983.76   | 70.95      | 3.64      | 376.45    | 11768.82  | -         | 4701.95   | 2055.84  | 1589.38  | 8337.56  | 30454.74         | 5.87      | 34.91     | 12.47     | 16.69     | 3.03          | 2.43      | 1301.93     |
|                                   | Belgium     | 68.78    | 17.66      | 40.93     | 733.36    | 19693.76  | 4938.12   | -         | 3316.50  | 3481.38  | 44212.85 | 64652.89         | 9.24      | 2.31      | 169.71    | 6.11      | 13.34         | 11.09     | 332.89      |
|                                   | Spain       | 6.55     | 0.00       | 51.92     | 1208.10   | 7097.77   | 2397.20   | 1171.51   | -        | 7844.42  | 40966.99 | 5722.73          | 1.44      | 10.24     | 0.00      | 0.00      | 4.79          | 0.00      | 199.87      |
|                                   | Italy       | 49.56    | 5.94       | 24.52     | 490.28    | 18133.00  | 5536.21   | 13113.49  | 18300.14 | -        | 61549.33 | 7332.30          | 16.56     | 87.61     | 0.00      | 5.62      | 47.83         | 2.97      | 83.74       |
|                                   | France      | 59.16    | 2.49       | 14.00     | 65.29     | 25031.83  | 12855.58  | 20799.92  | 3338.85  | 6663.28  | -        | 13044.71         | 0.25      | 62.69     | 4.51      | 5.99      | 4.25          | 0.06      | 2025.04     |
| Southeast Asia 5                  | Thailand    | 2403.39  | 2313.43    | 11954.30  | 7640.08   | 531.64    | 2848.23   | 1933.75   | 3984.13  | 38.33    | 593.53   | 21.78            | -         | 130.74    | 604.51    | 4904.34   | 163.48        | 59.50     | 316.76      |
|                                   | Indonesia   | 237.68   | 254.63     | 525.01    | 40721.46  | 511.80    | 17226.87  | 2761.35   | 1336.03  | 110.90   | 110.13   | 663.37           | 5.76      | -         | 197.80    | 8126.37   | 232.05        | 644.61    | 10571.53    |
|                                   | Viet Nam    | 125.06   | 87620.23   | 39209.54  | 28688.45  | 12279.63  | 23608.13  | 10232.66  | 13219.85 | 1779.51  | 1688.46  | 6128.33          | 10938.67  | 351.58    | -         | 3450.21   | 512.63        | 10399.08  | 650.35      |
|                                   | Malaysia    | 2642.70  | 4773.11    | 19747.90  | 25603.06  | 27949.84  | 34249.27  | 6581.52   | 13421.61 | 648.60   | 1315.38  | 690.01           | 3325.32   | 1598.88   | 914.94    | -         | 871.62        | 7481.40   | 2343.64     |
|                                   | Philippines | 371.20   | 1467.83    | 538.64    | 1141.61   | 10.44     | 527.03    | 155.12    | 121.03   | 0.63     | 60.82    | 0.30             | 93.09     | 42.65     | 101.56    | 232.55    | -             | 50.14     | 83.44       |
| Rep. of Korea                     |             | 1233.97  | 4298.79    | 40892.33  | 7713.79   | 1024.99   | 3178.26   | 2373.64   | 155.22   | 27.21    | 599.12   | 645.82           | 1127.42   | 2687.52   | 6399.48   | 2880.50   | 8021.28       | -         | 1927.74     |
| Mexico                            |             | 57.54    | 2.51       | 2.54      | 22452.24  | 238.84    | 14.64     | 165.43    | 53.72    | 25.29    | 9.46     | 4.97             | 0.05      | 0.00      | 0.00      | 0.67      | 0.00          | 0.74      | -           |

Supplementary Table 2. The trade flows of global plastic waste market from Comtrade in 2018 Scenario (Unit: t). (Corresponding to Figure 2.) \*Data with the orange background were estimated on the basis of monthly data, mirror data, and others.

| <i>Exporter</i> / <i>Importer</i> |         | China    | HK       | Japan    | USA     | Europe 7 |          |          |          |          |          | Southeast Asia 5 |          |           |          |          | Rep. of Korea | Mexico   |             |
|-----------------------------------|---------|----------|----------|----------|---------|----------|----------|----------|----------|----------|----------|------------------|----------|-----------|----------|----------|---------------|----------|-------------|
|                                   |         |          |          |          |         | Germany  | UK       | Belgium  | Spain    | Italy    | France   | Netherlands      | Thailand | Indonesia | Viet Nam | Malaysia |               |          | Philippines |
| China                             |         | -        | 49858.28 | 45969.68 | 0.00    | 13486.19 | 13860.30 | 4686.96  | 17215.99 | 5552.81  | 2974.70  | 1076.81          | 26634.67 | 61220.42  | 33174.34 | 11514.47 | 19673.12      | 10617.24 | 3070.73     |
| HK                                |         | 15635.38 | -        | 54299.49 | 0.00    | 72976.55 | 39783.61 | 23433.78 | 14234.68 | 1199.04  | 12626.63 | 8584.80          | 3549.82  | 640.67    | 2091.39  | 1827.17  | 1121.18       | 267.82   | 25910.36    |
| Japan                             |         | 1436.40  | 394.66   | -        | 663.82  | 1136.18  | 41.33    | 20.00    | 171.89   | 0.11     | 50.01    | 0.02             | 851.08   | 24.96     | 231.58   | 2017.63  | 125.63        | 952.92   | 31.34       |
| USA                               |         | 11625.58 | 682.90   | 9172.71  | -       | 12199.23 | 3437.91  | 7720.00  | 2265.87  | 4388.82  | 1441.74  | 354.55           | 7830.10  | 6106.69   | 2490.94  | 2376.22  | 3247.19       | 0.57     | 194974.64   |
| Europe 7                          | Germany | 284.72   | 0.00     | 3729.65  | 3458.58 | -        | 22685.73 | 33015.68 | 12053.26 | 26719.02 | 36140.90 | 72150.70         | 48.75    | 23.40     | 0.00     | 1.07     | 0.00          | 0.00     | 21.65       |
|                                   | UK      | 1425.05  | 78.48    | 66.83    | 553.82  | 27033.61 | -        | 5748.43  | 496.84   | 2277.67  | 18424.20 | 41558.27         | 1063.41  | 622.74    | 0.00     | 0.00     | 16.35         | 0.00     | 480.31      |

|                         |                    |          |           |           |           |           |           |           |          |          |           |          |          |         |          |          |         |          |          |
|-------------------------|--------------------|----------|-----------|-----------|-----------|-----------|-----------|-----------|----------|----------|-----------|----------|----------|---------|----------|----------|---------|----------|----------|
|                         | <b>Belgium</b>     | 131.76   | 0.00      | 158.87    | 2832.39   | 25040.25  | 20699.46  | -         | 1356.10  | 714.12   | 35793.13  | 53501.88 | 0.00     | 1600.07 | 31.01    | 4.80     | 0.00    | 285.91   | 89.36    |
|                         | <b>Spain</b>       | 105.51   | 0.00      | 2211.04   | 5225.30   | 8903.91   | 13821.58  | 1993.50   | -        | 17913.80 | 80663.01  | 2309.63  | 359.62   | 206.08  | 975.82   | 0.00     | 407.85  | 0.06     | 382.72   |
|                         | <b>Italy</b>       | 0.00     | 0.00      | 558.22    | 447.99    | 19344.40  | 8164.86   | 12596.71  | 4980.87  | -        | 114408.97 | 13081.59 | 252.15   | 1143.66 | 0.00     | 0.00     | 6.21    | 0.00     | 656.25   |
|                         | <b>France</b>      | 101.18   | 0.00      | 209.49    | 0.00      | 25220.81  | 17587.38  | 32820.64  | 8475.83  | 8348.71  | -         | 13569.36 | 0.00     | 20.00   | 0.00     | 60.25    | 0.00    | 0.00     | 2563.84  |
|                         | <b>Netherlands</b> | 209.78   | 96.09     | 1611.11   | 1865.27   | 121246.39 | 50841.96  | 154628.30 | 2640.54  | 700.89   | 36694.62  | -        | 0.00     | 20.00   | 0.46     | 0.00     | 17.10   | 9.68     | 138.08   |
| <b>Southeast Asia 5</b> | <b>Thailand</b>    | 19835.96 | 115001.23 | 187826.61 | 106929.19 | 2045.72   | 14379.92  | 331.73    | 13460.66 | 3628.90  | 676.75    | 53.02    | -        | 2250.85 | 68.08    | 10132.64 | 836.44  | 6864.43  | 8165.70  |
|                         | <b>Indonesia</b>   | 1747.41  | 4661.64   | 20449.54  | 27385.17  | 64458.92  | 71929.27  | 13835.20  | 4030.47  | 213.90   | 3293.98   | 24910.96 | 306.81   | -       | 1.64     | 7218.53  | 162.50  | 600.15   | 1571.94  |
|                         | <b>Viet Nam</b>    | 218.60   | 31750.91  | 123255.16 | 74433.85  | 56781.45  | 23422.60  | 27582.36  | 25049.40 | 5501.89  | 7511.82   | 14289.04 | 11516.16 | 3722.25 | -        | 1528.75  | 4332.32 | 26129.18 | 1772.18  |
|                         | <b>Malaysia</b>    | 7100.45  | 70634.43  | 220398.93 | 207044.51 | 131453.22 | 102087.61 | 33066.65  | 28748.06 | 12909.95 | 17681.83  | 8102.70  | 3132.81  | 5330.31 | 0.00     | -        | 744.29  | 11111.56 | 20815.48 |
|                         | <b>Philippines</b> | 101.36   | 3382.13   | 11485.18  | 6530.44   | 433.64    | 1347.14   | 120.54    | 238.24   | 19.90    | 195.55    | 0.10     | 718.34   | 1151.01 | 0.00     | 45.01    | -       | 8755.86  | 706.68   |
| <b>Rep. of Korea</b>    |                    | 2902.68  | 1196.48   | 101321.37 | 35510.22  | 7074.30   | 3967.92   | 7105.79   | 692.33   | 853.54   | 832.91    | 2562.90  | 27735.08 | 1663.89 | 15053.58 | 322.02   | 6843.16 | -        | 2836.16  |
| <b>Mexico</b>           |                    | 151.51   | 0.00      | 0.00      | 46201.22  | 888.50    | 0.00      | 727.95    | 0.99     | 909.31   | 25.68     | 87.24    | 231.76   | 0.00    | 1.47     | 0.00     | 5.20    | 20.00    | -        |

Supplementary Table 3. The data of ED and TFCR of exports. (Corresponding to Figure 3.)

| Countries and regions                    | HK         | Japan      | USA        | Germany    | UK        | Belgium   | Spain     | Italy     | France    | Netherlands | Thailand  | Indonesia | Viet Nam  | Malaysia  | Philippines | Rep. of Korea | Mexico    |
|------------------------------------------|------------|------------|------------|------------|-----------|-----------|-----------|-----------|-----------|-------------|-----------|-----------|-----------|-----------|-------------|---------------|-----------|
| <b>Total export flow of Baseline (t)</b> | 3290609.84 | 1657497.37 | 1979033.84 | 1363297.61 | 785685.89 | 437973.55 | 261225.50 | 219580.12 | 469302.57 | 413033.14   | 252411.03 | 148832.98 | 162611.90 | 176027.96 | 107699.82   | 212952.97     | 488776.15 |
| <b>ED</b>                                | 96.77%     | 87.60%     | 77.86%     | 63.40%     | 72.01%    | 59.29%    | 60.87%    | 43.02%    | 35.86%    | 38.44%      | 87.95%    | 95.11%    | 90.28%    | 80.76%    | 79.63%      | 90.32%        | 52.54%    |
| <b>TFCR of exports</b>                   | -0.9125    | -0.3918    | -0.5409    | -0.2339    | -0.1873   | 0.2119    | -0.3364   | -0.1024   | -0.0572   | -0.1635     | -0.2448   | -0.3381   | -0.6375   | -0.7380   | -0.3954     | -0.6831       | -0.3679   |

Supplementary Table 4. The proportion of types of plastics and three common treatment options for plastic waste.

| Country or region | Proportion of plastic types<br>(PE: PS: PVC: PET: PP: other) |    |                     |       |                     |       | Proportion of plastic waste treatments<br>(Landfill or mismanagement: Incineration: Recycling) |  |  |      |  |  |
|-------------------|--------------------------------------------------------------|----|---------------------|-------|---------------------|-------|------------------------------------------------------------------------------------------------|--|--|------|--|--|
|                   |                                                              |    |                     |       |                     |       | Baseline                                                                                       |  |  | 2018 |  |  |
|                   |                                                              |    |                     |       |                     |       |                                                                                                |  |  |      |  |  |
| China mainland    | 0.170: 0.019: 0.145: 0.233: 0.140: 0.293                     | 1  | 0.695: 0.116: 0.189 | 1     | 0.676: 0.124: 0.200 | 1     |                                                                                                |  |  |      |  |  |
| Hong Kong, China  | 0.462: 0.048: 0.041: 0.183: 0.266: 0                         | 2  | 0.550: 0.255: 0.195 | 3     | 0.550: 0.255: 0.195 | 3     |                                                                                                |  |  |      |  |  |
| Japan             | 0.231: 0.073: 0.158: 0.037: 0.221: 0.280                     | 4  | 0.080: 0.670: 0.250 | 5     | 0.060: 0.660: 0.280 | 6     |                                                                                                |  |  |      |  |  |
| USA               | 0.386: 0.083: 0.038: 0.118: 0.185: 0.190                     | 7  | 0.754: 0.155: 0.091 | 8     | 0.758: 0.158: 0.084 | 9     |                                                                                                |  |  |      |  |  |
| Germany           | 0.298: 0.066: 0.102: 0.074: 0.193: 0.267                     | 10 | 0.005: 0.605: 0.390 | 11    | 0.010: 0.610: 0.380 | 12    |                                                                                                |  |  |      |  |  |
| The UK            | 0.298: 0.066: 0.102: 0.074: 0.193: 0.267                     | 10 | 0.290: 0.390: 0.320 | 11    | 0.220: 0.470: 0.310 | 12    |                                                                                                |  |  |      |  |  |
| Belgium           | 0.298: 0.066: 0.102: 0.074: 0.193: 0.267                     | 10 | 0.020: 0.650: 0.330 | 11    | 0.020: 0.650: 0.330 | 12    |                                                                                                |  |  |      |  |  |
| Spain             | 0.298: 0.066: 0.102: 0.074: 0.193: 0.267                     | 10 | 0.480: 0.150: 0.370 | 11    | 0.390: 0.190: 0.420 | 12    |                                                                                                |  |  |      |  |  |
| Italy             | 0.298: 0.066: 0.102: 0.074: 0.193: 0.267                     | 10 | 0.370: 0.340: 0.290 | 11    | 0.370: 0.320: 0.310 | 12    |                                                                                                |  |  |      |  |  |
| France            | 0.298: 0.066: 0.102: 0.074: 0.193: 0.267                     | 10 | 0.340: 0.430: 0.230 | 11    | 0.340: 0.420: 0.240 | 12    |                                                                                                |  |  |      |  |  |
| Netherlands       | 0.298: 0.066: 0.102: 0.074: 0.193: 0.267                     | 10 | 0.010: 0.660: 0.330 | 11    | 0.000: 0.670: 0.330 | 12    |                                                                                                |  |  |      |  |  |
| Thailand          | 0.462: 0.048: 0.041: 0.183: 0.266: 0                         | 2  | 0.754: 0.030: 0.216 | 13,14 | 0.754: 0.030: 0.216 | 13,14 |                                                                                                |  |  |      |  |  |
| Indonesia         | 0.462: 0.048: 0.041: 0.183: 0.266: 0                         | 2  | 0.827: 0.021: 0.152 | 13,14 | 0.827: 0.021: 0.152 | 13,14 |                                                                                                |  |  |      |  |  |
| Viet Nam          | 0.462: 0.048: 0.041: 0.183: 0.266: 0                         | 2  | 0.879: 0.015: 0.106 | 13,14 | 0.879: 0.015: 0.106 | 13,14 |                                                                                                |  |  |      |  |  |
| Malaysia          | 0.462: 0.048: 0.041: 0.183: 0.266: 0                         | 2  | 0.570: 0.052: 0.378 | 13,14 | 0.570: 0.052: 0.378 | 13,14 |                                                                                                |  |  |      |  |  |
| Philippines       | 0.462: 0.048: 0.041: 0.183: 0.266: 0                         | 2  | 0.827: 0.021: 0.152 | 13,14 | 0.827: 0.021: 0.152 | 13,14 |                                                                                                |  |  |      |  |  |
| Rep. of Korea     | 0.462: 0.048: 0.041: 0.183: 0.266: 0                         | 2  | 0.241: 0.379: 0.380 | 15    | 0.241: 0.379: 0.380 | 15    |                                                                                                |  |  |      |  |  |
| Mexico            | 0.462: 0.048: 0.041: 0.183: 0.266: 0                         | 2  | 0.950: 0.000: 0.050 | 16    | 0.950: 0.000: 0.050 | 16    |                                                                                                |  |  |      |  |  |
| Other Countries   | 0.462: 0.048: 0.041: 0.183: 0.266: 0                         | 2  | 0.550: 0.255: 0.195 | 3     | 0.550: 0.255: 0.195 | 3     |                                                                                                |  |  |      |  |  |

Supplementary Table 5. EIT and Eco-costs of the China ban for 2018 Scenario. (Corresponding to Figure 5.)

| Indicator                                | Unit                        |               | Eco-costs value (Euro/kg) | EIT         |             |             |             | Eco-costs (Euro) |             |             |             |
|------------------------------------------|-----------------------------|---------------|---------------------------|-------------|-------------|-------------|-------------|------------------|-------------|-------------|-------------|
|                                          |                             |               |                           | Total       | (DM)        | (Exp)       | (tran)      | Total            | (DM)        | (Exp)       | (tran)      |
| global warming (GW)                      | kg CO2 eq                   | (unspecified) | 1.16E-01                  | 1.3420E+08  | 2.0220E+09  | -6.2736E+08 | -1.2605E+09 | 1.5567E+07       | 2.3456E+08  | -7.2774E+07 | -1.4621E+08 |
| fine particulate matter formation (FPMF) | kg PM2.5 eq                 | high. pop.    | 6.69E+01                  |             |             |             |             | -3.5350E+08      | -2.3535E+08 | 1.9600E+08  | -3.1415E+08 |
|                                          |                             | (unspecified) | 3.50E+01                  | -5.2880E+06 | -3.5206E+06 | 2.9319E+06  | -4.6993E+06 | -1.8508E+08      | -1.2322E+08 | 1.0262E+08  | -1.6448E+08 |
|                                          |                             | low. pop.     | 3.19E+00                  |             |             |             |             | -1.6869E+07      | -1.1231E+07 | 9.3527E+06  | -1.4991E+07 |
| freshwater ecotoxicity (FWE)             | kg 1,4DCB-eq to fresh water | (unspecified) | 3.37E-02                  | -5.6537E+07 | 8.3346E+08  | -8.8261E+08 | -7.3850E+06 | -1.9048E+06      | 2.8080E+07  | -2.9736E+07 | -2.4881E+05 |
|                                          |                             | ocean         | 2.29E-05                  |             |             |             |             | -1.2964E+03      | 1.9111E+04  | -2.0238E+04 | -1.6933E+02 |
| human carcinogenic toxicity (HCT)        | kg 1,4DCB-eq to urban air   | high. pop.    | 2.50E-01                  |             |             |             |             | -6.1719E+06      | -1.4339E+07 | 9.6313E+06  | -1.4638E+06 |
|                                          |                             | (unspecified) | 1.67E-01                  | -2.4664E+07 | -5.7302E+07 | 3.8488E+07  | -5.8496E+06 | -4.1070E+06      | -9.5420E+06 | 6.4091E+06  | -9.7408E+05 |
|                                          |                             | low. pop.     | 8.25E-02                  |             |             |             |             | -2.0354E+06      | -4.7288E+06 | 3.1762E+06  | -4.8273E+05 |
| water consumption (WC)                   | m3                          | (unspecified) | 6.60E-01                  | -3.2900E+09 | -4.0813E+09 | 9.8747E+08  | -1.9613E+08 | -2.1714E+09      | -2.6937E+09 | 6.5173E+08  | -1.2945E+08 |
| Eco-costs                                | Euro                        | (Max)         |                           |             |             |             |             | -2.5174E+09      | -2.6807E+09 | 7.5485E+08  | -5.9152E+08 |
|                                          |                             |               |                           |             |             |             |             | -2.3469E+09      | -2.5638E+09 | 6.5825E+08  | -4.4136E+08 |
|                                          |                             | (Min)         |                           |             |             |             |             | -2.1747E+09      | -2.4751E+09 | 5.9147E+08  | -2.9114E+08 |

Supplementary Table 6. The unit values on GW of countries with different incineration rates and per capita GDP. (The data of Per capita GDP are from the World Bank- <https://data.worldbank.org/cn/>)

| Countries                                                                                            | China    | HK, China | Japan     | USA       | Germany   | UK        | Belgium   | Spain     | Italy     | France    | Netherlands | Thailand | Indonesia | Viet Nam | Malaysia  | Philippines | Rep. of Korea | Mexico    |
|------------------------------------------------------------------------------------------------------|----------|-----------|-----------|-----------|-----------|-----------|-----------|-----------|-----------|-----------|-------------|----------|-----------|----------|-----------|-------------|---------------|-----------|
| Incineration rate in 2018                                                                            | 0.124    | 0.255     | 0.660     | 0.158     | 0.610     | 0.470     | 0.650     | 0.190     | 0.320     | 0.420     | 0.670       | 0.030    | 0.021     | 0.015    | 0.052     | 0.021       | 0.379         | 0.000     |
| Per capita GDP in 2018 (Unchanged dollar in 2010)                                                    | 7,755.00 | 38,784.80 | 48,919.60 | 54,541.70 | 47,501.80 | 42,986.00 | 46,683.20 | 33,146.40 | 35,391.70 | 43,663.60 | 55,022.90   | 6,361.60 | 4,284.70  | 1,964.50 | 12,109.50 | 3,022.00    | 26,761.90     | 10,385.30 |
| Unit impact values of domestic management in 2018 on GW (kg CO <sub>2</sub> eq / 1 kg plastic waste) | -0.04922 | 0.21615   | 0.88237   | 0.27757   | 0.56220   | 0.44472   | 0.86006   | -0.31868  | 0.15707   | 0.60528   | 0.76390     | -0.14075 | -0.05690  | 0.00404  | -0.35410  | -0.05690    | 0.19529       | 0.05311   |

Supplementary Table 7. Sensitivity analysis of some parameters of LCA in 2018 Scenario.

| Parameter                      |          | EIT                     |               |              |              |                   | EIT(DM)                 |               |              |              |                   | EIT(Exp)                |               |              |              |                   | EIT(tran)               |               |              |              |                   |
|--------------------------------|----------|-------------------------|---------------|--------------|--------------|-------------------|-------------------------|---------------|--------------|--------------|-------------------|-------------------------|---------------|--------------|--------------|-------------------|-------------------------|---------------|--------------|--------------|-------------------|
|                                |          | GW                      | FPMF          | FEW          | HCT          | WC                | GW                      | FPMF          | FEW          | HCT          | WC                | GW                      | FPMF          | FEW          | HCT          | WC                | GW                      | FPMF          | FEW          | HCT          | WC                |
|                                |          | (kg CO <sub>2</sub> eq) | (kg PM2.5 eq) | (kg 1,4-DCB) | (kg 1,4-DCB) | (m <sup>3</sup> ) | (kg CO <sub>2</sub> eq) | (kg PM2.5 eq) | (kg 1,4-DCB) | (kg 1,4-DCB) | (m <sup>3</sup> ) | (kg CO <sub>2</sub> eq) | (kg PM2.5 eq) | (kg 1,4-DCB) | (kg 1,4-DCB) | (m <sup>3</sup> ) | (kg CO <sub>2</sub> eq) | (kg PM2.5 eq) | (kg 1,4-DCB) | (kg 1,4-DCB) | (m <sup>3</sup> ) |
| Road transportation distance   | 50 km    | 2.18E+08                | -5.25E+06     | -5.49E+07    | -1.95E+07    | -3.09E+09         | 1.98E+09                | -3.64E+06     | 8.33E+08     | -5.73E+07    | -4.08E+09         | -5.64E+08               | 3.01E+06      | -8.82E+08    | 4.11E+07     | 1.09E+09          | -1.20E+09               | -4.62E+06     | -6.44E+06    | -3.25E+06    | -9.81E+07         |
|                                | 100 km   | 1.34E+08                | -5.29E+06     | -5.65E+07    | -2.47E+07    | -3.29E+09         | 2.02E+09                | -3.52E+06     | 8.33E+08     | -5.73E+07    | -4.08E+09         | -6.27E+08               | 2.93E+06      | -8.83E+08    | 3.85E+07     | 9.87E+08          | -1.26E+09               | -4.70E+06     | -7.39E+06    | -5.85E+06    | -1.96E+08         |
|                                | 200 km   | -3.28E+07               | -5.36E+06     | -5.98E+07    | -3.50E+07    | -3.68E+09         | 2.11E+09                | -3.29E+06     | 8.34E+08     | -5.72E+07    | -4.08E+09         | -7.54E+08               | 2.78E+06      | -8.84E+08    | 3.33E+07     | 7.91E+08          | -1.39E+09               | -4.85E+06     | -9.27E+06    | -1.10E+07    | -3.92E+08         |
| Unit avoided electricity /1 kg | 0.85 kWh | 1.43E+08                | -5.33E+06     | -5.58E+07    | -2.35E+07    | -3.04E+09         | 2.11E+09                | -3.34E+06     | 8.34E+08     | -5.51E+07    | -3.81E+09         | -7.04E+08               | 2.71E+06      | -8.83E+08    | 3.75E+07     | 9.68E+08          | -1.26E+09               | -4.70E+06     | -7.39E+06    | -5.85E+06    | -1.96E+08         |
|                                | 0.9 kWh  | 1.34E+08                | -5.29E+06     | -5.65E+07    | -2.47E+07    | -3.29E+09         | 2.02E+09                | -3.52E+06     | 8.33E+08     | -5.73E+07    | -4.08E+09         | -6.27E+08               | 2.93E+06      | -8.83E+08    | 3.85E+07     | 9.87E+08          | -1.26E+09               | -4.70E+06     | -7.39E+06    | -5.85E+06    | -1.96E+08         |
|                                | 0.95 kWh | 1.26E+08                | -5.24E+06     | -5.73E+07    | -2.59E+07    | -3.54E+09         | 1.94E+09                | -3.70E+06     | 8.33E+08     | -5.95E+07    | -4.35E+09         | -5.50E+08               | 3.16E+06      | -8.82E+08    | 3.94E+07     | 1.01E+09          | -1.26E+09               | -4.70E+06     | -7.39E+06    | -5.85E+06    | -1.96E+08         |

|                                       |          |          |           |           |           |           |          |           |          |           |           |           |          |           |          |          |           |           |           |           |           |
|---------------------------------------|----------|----------|-----------|-----------|-----------|-----------|----------|-----------|----------|-----------|-----------|-----------|----------|-----------|----------|----------|-----------|-----------|-----------|-----------|-----------|
| Unit avoided plastic production /1 kg | 0.86 kg  | 1.67E+08 | -5.26E+06 | -5.64E+07 | -2.38E+07 | -3.28E+09 | 2.19E+09 | -3.38E+06 | 8.34E+08 | -5.30E+07 | -4.00E+09 | -7.62E+08 | 2.82E+06 | -8.83E+08 | 3.51E+07 | 9.19E+08 | -1.26E+09 | -4.70E+06 | -7.39E+06 | -5.85E+06 | -1.96E+08 |
|                                       | 0.91 kg  | 1.34E+08 | -5.29E+06 | -5.65E+07 | -2.47E+07 | -3.29E+09 | 2.02E+09 | -3.52E+06 | 8.33E+08 | -5.73E+07 | -4.08E+09 | -6.27E+08 | 2.93E+06 | -8.83E+08 | 3.85E+07 | 9.87E+08 | -1.26E+09 | -4.70E+06 | -7.39E+06 | -5.85E+06 | -1.96E+08 |
|                                       | 0.96 kg  | 1.02E+08 | -5.31E+06 | -5.67E+07 | -2.55E+07 | -3.30E+09 | 1.85E+09 | -3.66E+06 | 8.33E+08 | -6.16E+07 | -4.16E+09 | -4.92E+08 | 3.05E+06 | -8.82E+08 | 4.19E+07 | 1.06E+09 | -1.26E+09 | -4.70E+06 | -7.39E+06 | -5.85E+06 | -1.96E+08 |
| Unit electricity consumption /1 kg    | 0.55 kWh | 1.51E+08 | -5.20E+06 | -5.69E+07 | -2.51E+07 | -3.44E+09 | 1.96E+09 | -3.67E+06 | 8.33E+08 | -5.89E+07 | -4.26E+09 | -5.45E+08 | 3.16E+06 | -8.82E+08 | 3.96E+07 | 1.02E+09 | -1.26E+09 | -4.70E+06 | -7.39E+06 | -5.85E+06 | -1.96E+08 |
|                                       | 0.6 kWh  | 1.34E+08 | -5.29E+06 | -5.65E+07 | -2.47E+07 | -3.29E+09 | 2.02E+09 | -3.52E+06 | 8.33E+08 | -5.73E+07 | -4.08E+09 | -6.27E+08 | 2.93E+06 | -8.83E+08 | 3.85E+07 | 9.87E+08 | -1.26E+09 | -4.70E+06 | -7.39E+06 | -5.85E+06 | -1.96E+08 |
|                                       | 0.65 kWh | 1.17E+08 | -5.37E+06 | -5.62E+07 | -2.42E+07 | -3.14E+09 | 2.09E+09 | -3.37E+06 | 8.34E+08 | -5.57E+07 | -3.90E+09 | -7.09E+08 | 2.70E+06 | -8.83E+08 | 3.74E+07 | 9.54E+08 | -1.26E+09 | -4.70E+06 | -7.39E+06 | -5.85E+06 | -1.96E+08 |

$$\text{Sensitivity coefficient} = \left( \frac{\Delta EIT_i}{EIT_i} \right) / \left( \frac{\Delta \text{Parameter}_i}{\text{Parameter}_i} \right)$$

|                                 |       |       |       |       |       |       |       |       |       |       |       |       |       |       |       |      |      |      |      |      |
|---------------------------------|-------|-------|-------|-------|-------|-------|-------|-------|-------|-------|-------|-------|-------|-------|-------|------|------|------|------|------|
| Road transportation distance    | -1.24 | 0.01  | 0.06  | 0.42  | 0.12  | 0.04  | -0.07 | 0.00  | 0.00  | 0.00  | 0.20  | -0.05 | 0.00  | -0.14 | -0.20 | 0.10 | 0.03 | 0.26 | 0.89 | 1.00 |
| Unit avoided electricity        | -1.15 | -0.15 | 0.23  | 0.89  | 1.36  | -0.76 | 0.93  | -0.02 | 0.68  | 1.18  | -2.21 | 1.38  | 0.00  | 0.45  | 0.36  | 0.00 | 0.00 | 0.00 | 0.00 | 0.00 |
| Unit avoided plastic production | -4.43 | 0.09  | 0.05  | 0.64  | 0.07  | -1.51 | 0.72  | -0.02 | 1.36  | 0.36  | -3.92 | 0.70  | -0.02 | 1.62  | 1.25  | 0.00 | 0.00 | 0.00 | 0.00 | 0.00 |
| Unit electricity consumption    | -1.54 | 0.20  | -0.08 | -0.23 | -0.55 | 0.38  | -0.50 | 0.01  | -0.33 | -0.54 | 1.57  | -0.95 | 0.00  | -0.34 | -0.41 | 0.00 | 0.00 | 0.00 | 0.00 | 0.00 |

Supplementary Table 8. Data of environmental impacts used in LCA of plastic waste trade flow change.

| Data of         | Selected datasets (“products” or “processes” in SimaPro)                                                                                                                                                                                                                                                                                                                                                                                                                                                                                                                                                                                                                                                                                                                                                                                                                                                                                   | Source database                                        |
|-----------------|--------------------------------------------------------------------------------------------------------------------------------------------------------------------------------------------------------------------------------------------------------------------------------------------------------------------------------------------------------------------------------------------------------------------------------------------------------------------------------------------------------------------------------------------------------------------------------------------------------------------------------------------------------------------------------------------------------------------------------------------------------------------------------------------------------------------------------------------------------------------------------------------------------------------------------------------|--------------------------------------------------------|
| Transportation  | <b>Road</b><br>Transport, lorry >32t, EURO5/RER U;<br>Transport, lorry 16-32t, EURO5/RER U;<br>Transport, lorry 3.5-16t, fleet average/RER U;<br>Transport, refuse truck, diesel powered/tkm/RNA                                                                                                                                                                                                                                                                                                                                                                                                                                                                                                                                                                                                                                                                                                                                           | Ecoinvent unit processes<br><br>USLCI                  |
|                 | <b>Ocean</b><br>Transport, ocean freighter, average fuel mix/US                                                                                                                                                                                                                                                                                                                                                                                                                                                                                                                                                                                                                                                                                                                                                                                                                                                                            | USLCI                                                  |
| Waste treatment | <b>Landfill</b><br>Waste plastic, mixture   treatment of, sanitary landfill   APOS, U;<br>Waste polyethylene   treatment of, sanitary landfill   APOS, U;<br>Waste polyethylene terephthalate   treatment of, sanitary landfill   APOS, U;<br>Waste polypropylene   treatment of, sanitary landfill   APOS, U;<br>Waste polystyrene   treatment of, sanitary landfill   APOS, U;<br>Waste polyvinylchloride   treatment of, sanitary landfill   APOS, U;<br><b>Incineration</b><br>Treatment of waste plastic, mixture, municipal incineration   APOS, U;<br>Treatment of waste polyethylene, municipal incineration   APOS, U;<br>Treatment of waste polyethylene terephthalate, municipal incineration with fly ash extraction   APOS, U;<br>Treatment of waste polypropylene, municipal incineration   APOS, U;<br>Treatment of waste polystyrene, municipal incineration   APOS, U;<br>Treatment of waste polyvinylchloride, municipal | Ecoinvent – allocation at point of substitution – unit |

|                                                     |                                                                                                                                                                                                                                                                                                                                                                                                                                                                                                                                                                       |                          |
|-----------------------------------------------------|-----------------------------------------------------------------------------------------------------------------------------------------------------------------------------------------------------------------------------------------------------------------------------------------------------------------------------------------------------------------------------------------------------------------------------------------------------------------------------------------------------------------------------------------------------------------------|--------------------------|
|                                                     | incineration   APOS, U.<br>(each process has two versions: Europe without Switzerland and RoW)                                                                                                                                                                                                                                                                                                                                                                                                                                                                        |                          |
| Electricity                                         | Electricity, medium voltage, at grid/CN U (China) and national grid data of Japan (JP), the U.S. (US), Germany (DE), the UK (GB), Belgium (BE), Spain (ES), Italy (IT), France (FR), and Netherland (NL)                                                                                                                                                                                                                                                                                                                                                              | Ecoinvent unit processes |
| Plastic production (used to model avoided products) | <b>PE</b><br>Polyethylene, HDPE, granulate, at plant/RER U ;<br>Polyethylene, LDPE, granulate, at plant/RER U ;<br>Polyethylene, LLDPE, granulate, at plant/RER U ;<br><b>PS</b><br>Polystyrene, expandable, at plant/RER U ;<br><b>PVC</b><br>Polyvinylchloride, at regional storage/RER U ;<br><b>PET</b><br>Polyethylene terephthalate, granulate, amorphous, at plant/RER U ;<br>Polyethylene terephthalate, granulate, bottle grade, at plant/RER U ;<br><b>PP</b><br>Polypropylene, granulate, at plant/RER U ;<br><b>Other</b><br>Mean value of the data above | Ecoinvent unit processes |

Supplementary Table 9. Comparison among environmental impacts of changes in waste flows and treatment structure in different scenarios.

| Value<br>Indicator             | Scenario<br>2018 | Exports Scenarios |                 |                                        |                                         | Recycling rate Scenarios    |                             |                              | Combination Scenarios                        |                                              |
|--------------------------------|------------------|-------------------|-----------------|----------------------------------------|-----------------------------------------|-----------------------------|-----------------------------|------------------------------|----------------------------------------------|----------------------------------------------|
|                                |                  | Zero exports      | Half of exports | Half of exports of developed countries | Half of exports of developing countries | 20% increase recycling rate | 50% increase recycling rate | 100% increase recycling rate | Half of exports +20% increase recycling rate | Half of exports +50% increase recycling rate |
| GW (kg CO <sub>2</sub> eq)     | 1.34E+08         | 1.06E+09          | 5.97E+08        | 7.60E+08                               | -2.94E+07                               | 1.49E+07                    | -6.03E+07                   | -4.57E+07                    | 4.94E+08                                     | 5.42E+08                                     |
| FPMF (kg PM <sub>2.5</sub> eq) | -5.29E+06        | -1.04E+07         | -7.85E+06       | -7.55E+06                              | -5.58E+06                               | -5.55E+06                   | -5.88E+06                   | -6.32E+06                    | -8.18E+06                                    | -8.54E+06                                    |
| FWE (kg 1,4-DCB eq)            | -5.65E+07        | -8.86E+07         | -7.26E+07       | -8.07E+07                              | -4.84E+07                               | -6.04E+07                   | -5.84E+07                   | -4.39E+07                    | -7.33E+07                                    | -5.91E+07                                    |
| HCT (kg 1,4-DCB eq)            | -2.47E+07        | -2.53E+07         | -2.50E+07       | -2.67E+07                              | -2.29E+07                               | -2.57E+07                   | -2.46E+07                   | -1.92E+07                    | -2.54E+07                                    | -2.10E+07                                    |
| WC (m <sub>3</sub> )           | -3.29E+09        | -5.76E+09         | -4.53E+09       | -4.53E+09                              | -3.29E+09                               | -2.97E+09                   | -2.59E+09                   | -1.99E+09                    | -4.22E+09                                    | -3.90E+09                                    |
| Eco-costs (Euro/year)          | -2.35E+09        | -4.05E+09         | -3.20E+09       | -3.17E+09                              | -2.37E+09                               | -2.16E+09                   | -1.93E+09                   | -1.54E+09                    | -3.02E+09                                    | -2.82E+09                                    |

Values of 2018 scaled to 1:

|                  |    |       |       |       |       |       |       |       |       |       |
|------------------|----|-------|-------|-------|-------|-------|-------|-------|-------|-------|
| GW               | 1  | 7.90  | 4.45  | 5.67  | -0.22 | 0.11  | -0.45 | -0.34 | 3.68  | 4.04  |
| FPMF             | -1 | -1.97 | -1.48 | -1.43 | -1.06 | -1.05 | -1.11 | -1.19 | -1.55 | -1.61 |
| FWE              | -1 | -1.57 | -1.28 | -1.43 | -0.86 | -1.07 | -1.03 | -0.78 | -1.30 | -1.05 |
| HCT              | -1 | -1.03 | -1.01 | -1.08 | -0.93 | -1.04 | -1.00 | -0.78 | -1.03 | -0.85 |
| WC               | -1 | -1.75 | -1.38 | -1.38 | -1.00 | -0.90 | -0.79 | -0.61 | -1.28 | -1.19 |
| <b>Eco-costs</b> | -1 | -1.73 | -1.36 | -1.35 | -1.01 | -0.92 | -0.82 | -0.66 | -1.29 | -1.20 |

Supplementary Table 10. The trade flows of global plastic waste market from Comtrade in 2019 Scenario (Unit: t). \*Data with the orange background were estimated on the basis of mirror data and blank table indicate missing data.

| <i>Exporter</i><br><i>Importer</i> | China              | HK     | Japan    | USA       | Europe 7 |           |          |          |          |         | Southeast Asia 5 |          |           |          |          | Rep. of Korea | Mexico |
|------------------------------------|--------------------|--------|----------|-----------|----------|-----------|----------|----------|----------|---------|------------------|----------|-----------|----------|----------|---------------|--------|
|                                    |                    |        |          |           | Germany  | UK        | Belgium  | Spain    | Italy    | France  | Netherlands      | Thailand | Indonesia | Viet Nam | Malaysia |               |        |
| <b>China</b>                       | -                  | 271.45 | 19202.23 | 16910.39  | 2632.46  | 9413.02   | 2669.71  |          | 5910.63  |         |                  |          |           |          |          | 1853.62       |        |
| <b>HK</b>                          |                    | -      | 57348.57 | 72743.29  | 93110.15 | 62231.39  | 39360.66 |          | 808.12   |         |                  |          |           |          |          | 702.53        |        |
| <b>Japan</b>                       |                    | 71.74  | -        | 585.37    | 278.31   | 44.33     |          |          |          |         |                  |          |           |          |          | 398.65        |        |
| <b>USA</b>                         |                    | 43.79  | 15727.87 | -         | 14377.44 | 1022.80   | 3422.62  |          | 1623.67  |         |                  |          |           |          |          | 378.41        |        |
| <b>Europe 7</b>                    | <b>Germany</b>     |        | 141.42   | 2639.76   | 1137.18  | -         | 31764.61 | 28042.34 | 18561.86 |         |                  |          |           |          |          | 2.00          |        |
|                                    | <b>UK</b>          |        | 2.68     | 68.52     | 816.68   | 33162.28  | -        | 4188.88  | 122.24   |         |                  |          |           |          |          |               |        |
|                                    | <b>Belgium</b>     |        | 46.63    | 358.55    | 2297.52  | 26367.45  | 19509.02 | -        | 718.62   |         |                  |          |           |          |          |               |        |
|                                    | <b>Spain</b>       |        | 0.00     | 2385.16   | 4397.18  | 5139.39   | 28967.13 | 1283.21  | -        | 8005.43 |                  |          |           |          |          | 0.00          |        |
|                                    | <b>Italy</b>       |        |          | 168.66    | 510.91   | 17784.37  | 12614.03 | 7901.47  |          | -       |                  |          |           |          |          | 2.98          |        |
|                                    | <b>France</b>      |        | 0.00     | 143.57    | 142.70   | 20055.86  | 22105.80 | 42605.79 |          | 8605.05 | -                |          |           |          |          | 0.00          |        |
| <b>Southeast Asia 5</b>            | <b>Netherlands</b> |        | 0.00     | 490.93    | 246.79   | 142980.36 | 54251.69 | 97427.62 |          | 587.35  |                  | -        |           |          |          | 0.00          |        |
|                                    | <b>Thailand</b>    |        | 91625.38 | 102332.80 | 27218.89 | 1550.30   | 1194.41  | 128.74   | 373.51   |         |                  | -        |           |          |          | 3115.51       |        |
|                                    | <b>Indonesia</b>   |        | 1365.52  | 16929.25  | 24338.91 | 34337.97  | 22537.93 | 14817.02 | 24.71    |         |                  |          | -         |          |          | 701.42        |        |
|                                    | <b>Viet Nam</b>    |        | 80438.07 | 116616.64 | 21620.17 | 14892.05  | 152.82   | 16252.57 | 526.83   |         |                  |          |           | -        |          | 13546.90      |        |
|                                    | <b>Malaysia</b>    |        | 51127.54 | 261743.04 | 60625.26 | 182486.96 | 0.00     | 62533.05 | 11542.51 |         |                  |          |           |          | -        | 8857.19       |        |
|                                    | <b>Philippines</b> |        | 1627.76  | 13907.65  | 7888.33  | 339.19    | 0.00     | 22.96    | 0.00     |         |                  |          |           |          | -        | 517.12        |        |
| <b>Rep. of Korea</b>               |                    | 498.73 | 88878.90 | 30980.46  | 6932.30  | 4450.72   | 6107.97  |          | 46.07    |         |                  |          |           |          |          | -             |        |
| <b>Mexico</b>                      |                    | 0.00   | 0.00     | 36943.18  | 668.44   | 0.00      | 439.68   |          | 1279.82  |         |                  |          |           |          |          | 0.00          |        |

Supplementary Table 11. The trade flows of global plastic waste market from Comtrade in 2017 Scenario (Unit: t).

| <i>Importer</i> \ <i>Exporter</i> | China              | HK         | Japan     | USA       | Europe 7  |           |           |           |          |          |             | Southeast Asia 5 |           |           |           |             | Rep. of Korea | Mexico    |         |
|-----------------------------------|--------------------|------------|-----------|-----------|-----------|-----------|-----------|-----------|----------|----------|-------------|------------------|-----------|-----------|-----------|-------------|---------------|-----------|---------|
|                                   |                    |            |           |           | Germany   | UK        | Belgium   | Spain     | Italy    | France   | Netherlands | Thailand         | Indonesia | Viet Nam  | Malaysia  | Philippines |               |           |         |
| <b>China</b>                      | -                  | 1710971.30 | 749380.74 | 557875.21 | 345836.66 | 164174.98 | 113768.77 | 115911.32 | 40115.32 | 77750.26 | 69736.50    | 333515.11        | 173938.16 | 265923.12 | 115844.79 | 55826.87    | 119574.90     | 95952.68  |         |
| <b>HK</b>                         | 297.61             | -          | 274759.41 | 373147.81 | 99193.96  | 77543.60  | 31566.27  | 46982.88  | 2081.25  | 36971.76 | 18918.54    | 41311.27         | 5431.13   | 5237.53   | 14838.75  | 4541.55     | 7028.83       | 55338.94  |         |
| <b>Japan</b>                      | 491.19             | 165.70     | -         | 1260.55   | 32.45     | 21.70     | 378.05    | 159.43    | 0.00     | 0.04     | 2.87        | 344.68           | 2.90      | 2232.21   | 38.20     | 947.08      | 921.00        | 2.94      |         |
| <b>USA</b>                        | 10073.82           | 148.97     | 3523.87   | -         | 16109.13  | 920.38    | 6190.06   | 300.82    | 6436.50  | 1631.93  | 291.36      | 2388.78          | 2731.83   | 4.71      | 567.01    | 0.01        | 233.46        | 190040.84 |         |
| <b>Europe 7</b>                   | <b>Germany</b>     | 168.57     | 0.00      | 14.62     | 1043.22   | -         | 23256.09  | 30690.85  | 9399.43  | 28798.71 | 35090.53    | 76820.36         | 0.64      | 0.02      | 0.00      | 20.46       | 0.00          | 0.00      | 59.30   |
|                                   | <b>UK</b>          | 1254.35    | 0.00      | 65.70     | 339.61    | 24373.77  | -         | 4233.22   | 1217.28  | 3296.77  | 6810.53     | 59056.86         | 0.00      | 10.16     | 4.90      | 0.00        | 0.00          | 0.00      | 364.12  |
|                                   | <b>Belgium</b>     | 54.40      | 23.74     | 45.05     | 1254.25   | 21017.35  | 8786.10   | -         | 1222.33  | 1687.07  | 28001.62    | 47440.94         | 0.00      | 140.00    | 0.00      | 0.00        | 0.00          | 0.00      | 157.15  |
|                                   | <b>Spain</b>       | 23.80      | 0.00      | 1106.62   | 8593.95   | 8003.49   | 1967.38   | 1772.73   | -        | 13583.31 | 66445.41    | 2650.57          | 0.00      | 0.00      | 0.00      | 25.94       | 0.00          | 0.00      | 65.89   |
|                                   | <b>Italy</b>       | 26.65      | 0.00      | 40.00     | 15.37     | 20707.45  | 6036.46   | 11534.47  | 27518.18 | -        | 79222.28    | 11059.11         | 0.00      | 360.00    | 0.00      | 0.00        | 0.00          | 0.00      | 92.38   |
|                                   | <b>France</b>      | 0.00       | 0.00      | 0.00      | 59.01     | 22556.00  | 14125.24  | 34068.43  | 9514.41  | 7342.75  | -           | 11353.74         | 0.00      | 0.39      | 3.82      | 0.00        | 0.00          | 0.00      | 80.65   |
|                                   | <b>Netherlands</b> | 164.61     | 0.00      | 0.00      | 1570.67   | 141680.89 | 45146.57  | 97022.05  | 3093.74  | 1941.17  | 38013.87    | -                | 0.00      | 0.00      | 0.00      | 0.00        | 0.00          | 0.00      | 0.00    |
| <b>Southeast Asia 5</b>           | <b>Thailand</b>    | 2467.13    | 10919.68  | 58160.48  | 32862.36  | 2702.27   | 2420.70   | 3462.11   | 4187.33  | 417.06   | 270.90      | 290.49           | -         | 590.45    | 429.75    | 6813.29     | 214.14        | 604.24    | 386.95  |
|                                   | <b>Indonesia</b>   | 722.80     | 474.01    | 2699.51   | 29174.87  | 564.62    | 38592.05  | 4935.94   | 790.49   | 0.00     | 439.91      | 1387.40          | 16.87     | -         | 58.67     | 1986.25     | 68.94         | 401.52    | 3402.77 |
|                                   | <b>Viet Nam</b>    | 294.73     | 21595.30  | 126219.22 | 137193.47 | 69242.47  | 54312.66  | 44336.58  | 23601.20 | 5959.17  | 6200.51     | 9291.73          | 18951.28  | 1183.68   | -         | 1316.39     | 104.60        | 50787.06  | 2548.31 |
|                                   | <b>Malaysia</b>    | 2166.88    | 32885.50  | 75435.09  | 121139.66 | 75242.09  | 91468.71  | 18051.47  | 22213.22 | 4369.80  | 15455.43    | 2948.30          | 534.39    | 2192.18   | 157.01    | -           | 1028.92       | 12984.90  | 5233.71 |
|                                   | <b>Philippines</b> | 0.00       | 4895.09   | 2138.91   | 3635.06   | 176.00    | 1418.58   | 76.98     | 195.36   | 0.00     | 0.00        | 0.96             | 236.83    | 147.42    | 46.10     | 41.96       | -             | 4397.46   | 283.09  |
| <b>Rep. of Korea</b>              | 91.82              | 760.55     | 33258.10  | 9139.37   | 842.63    | 4593.84   | 2964.16   | 266.56    | 39.64    | 115.55   | 1048.54     | 107.41           | 1583.94   | 17737.25  | 300.38    | 2428.00     | -             | 655.18    |         |
| <b>Mexico</b>                     | 134.73             | 0.00       | 0.00      | 47175.43  | 1333.57   | 0.00      | 862.57    | 244.37    | 293.64   | 27.74    | 1.36        | 0.00             | 0.00      | 0.00      | 0.00      | 0.00        | 0.00          | 6.22      | -       |

# Figure

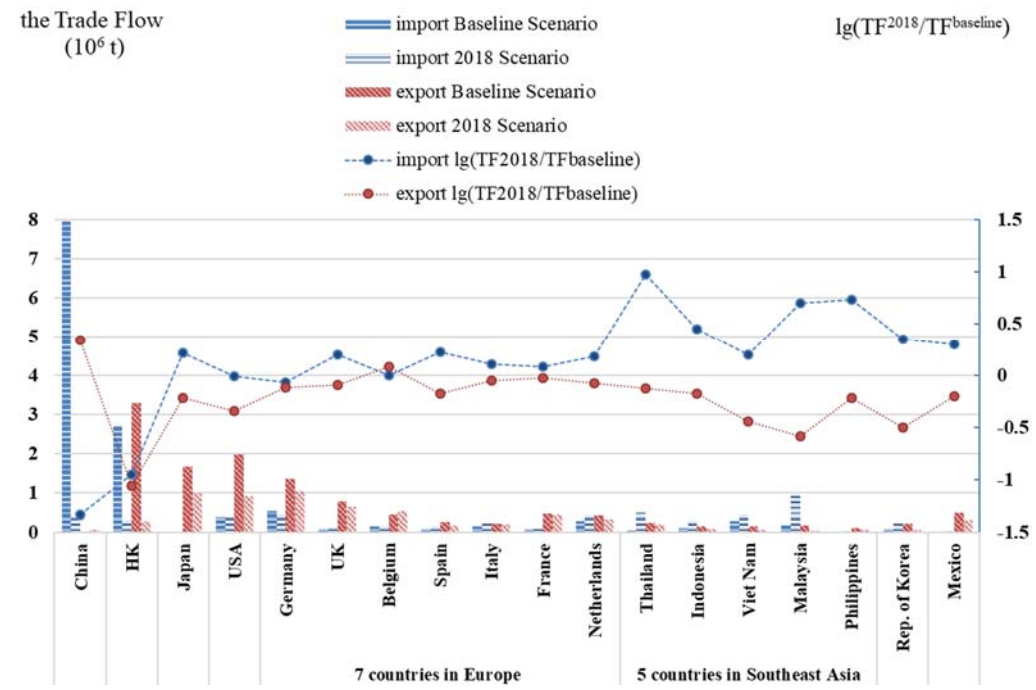

Supplementary Figure 1. The changes of import and export flows after the ban.

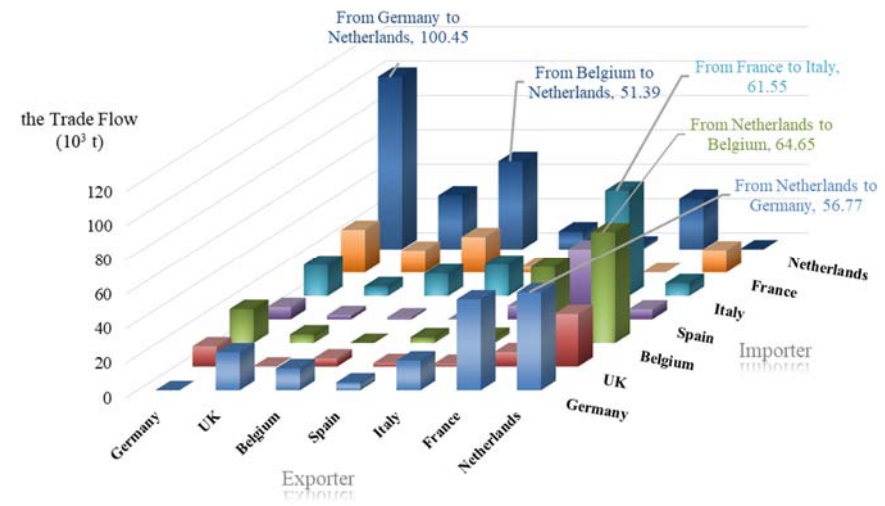

Supplementary Figure 2. The trade flows among Europe 7 members in Baseline Scenario.



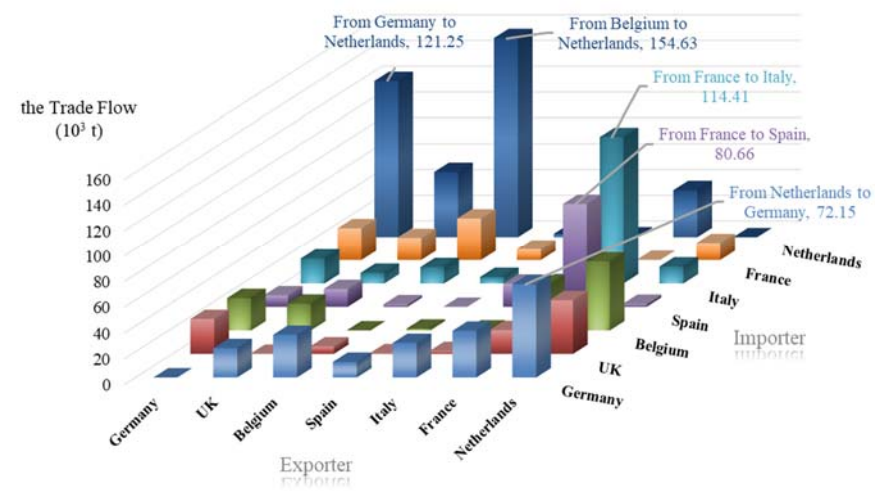

Supplementary Figure 3. The trade flows among Europe 7 members in 2018 Scenario.

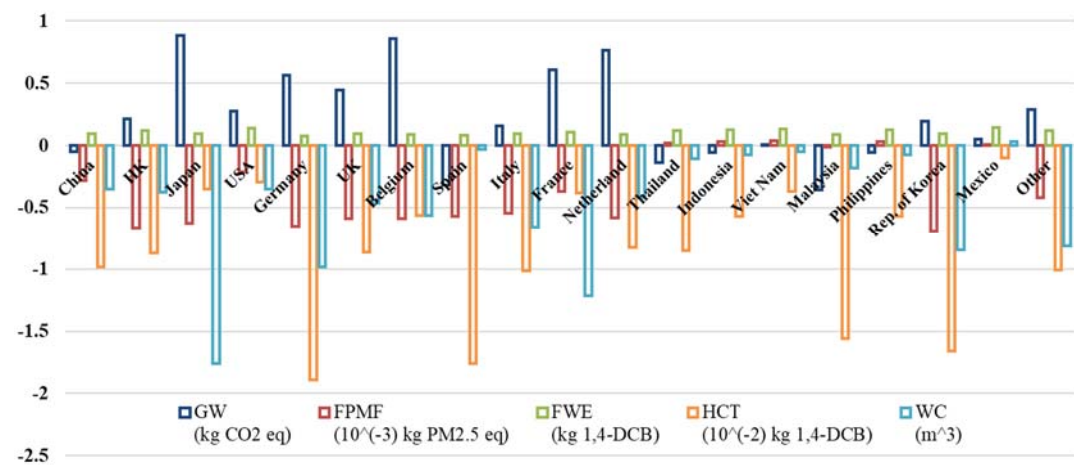

Supplementary Figure 4. The EIT of treating 1 kg of plastic waste in domestic management in 2018.

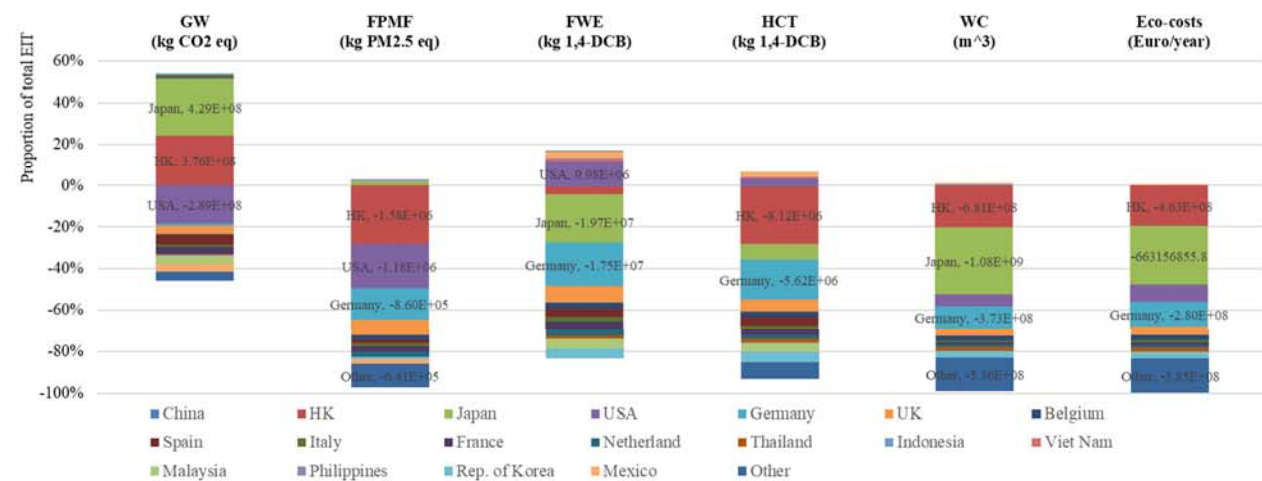

(a) Export countries

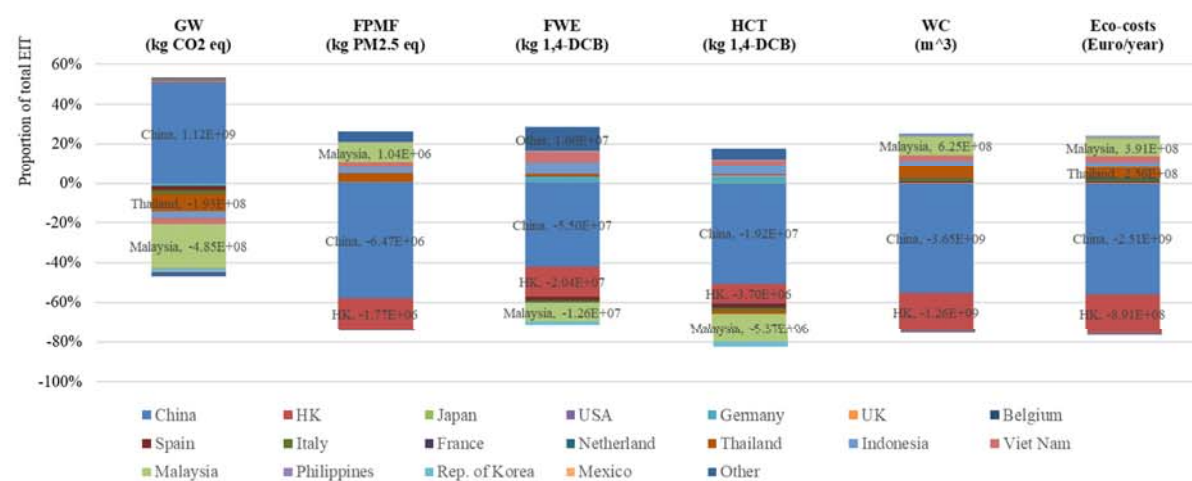

(b) Import countries

Supplementary Figure 5. Contribution of changes of export and import countries to total EIT in 2018 Scenario.

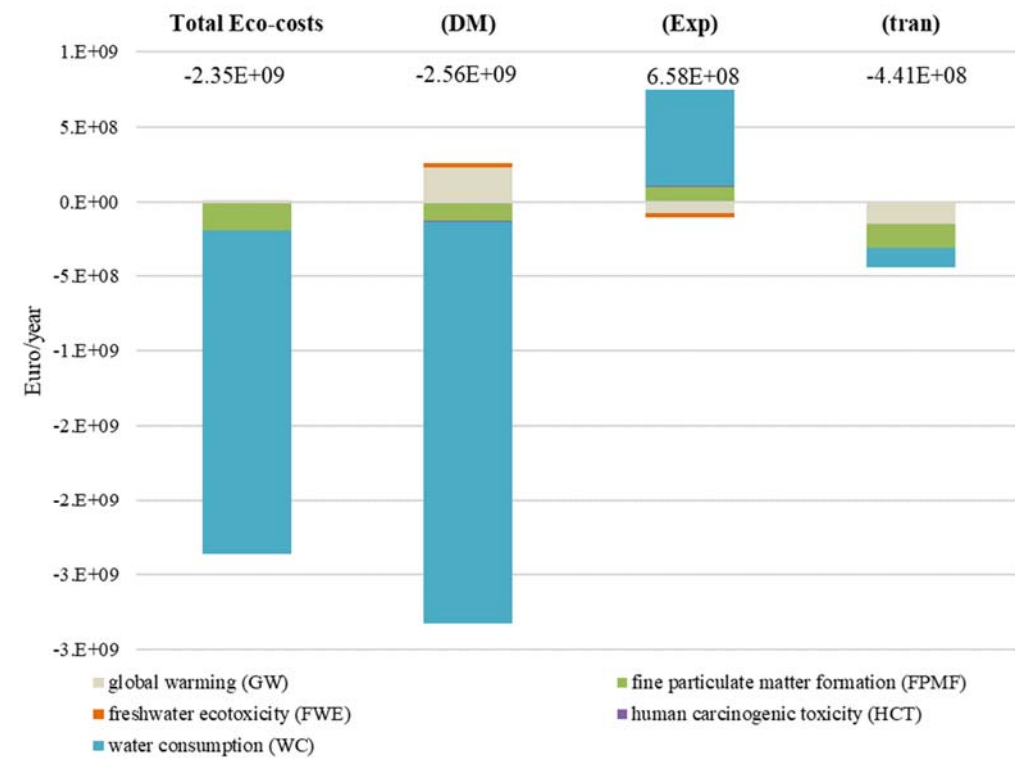

Supplementary Figure 6. Contributions of Eco-costs in 2018 Scenario of each midpoint category.

### Supplementary References

- 1 Chen, Y. *et al.* Life cycle assessment of end-of-life treatments of waste plastics in China. *Resources Conservation and Recycling* **146**, 348-357, doi:10.1016/j.resconrec.2019.03.011 (2019).
- 2 Recycling of mixed plastics GLO. *Ecoinvent & PRé*.
- 3 Ritchie, H. & Roser, M. *Plastic Pollution*, <<https://ourworldindata.org/plastic-pollution>> (2018).
- 4 The Japan Plastics Industry Federation. *Production of Plastics Materials 2018 Japan*, <[http://www.jpif.gr.jp/english/statistics/monthly/2018/2018\\_production\\_materials\\_e.htm](http://www.jpif.gr.jp/english/statistics/monthly/2018/2018_production_materials_e.htm)> (2019).
- 5 Inoue, Y. *Japan's Resource Circulation Policy for Plastics*, <[http://ec.europa.eu/environment/international\\_issues/pdf/S2-02-Yusuke%20Inoue.pdf](http://ec.europa.eu/environment/international_issues/pdf/S2-02-Yusuke%20Inoue.pdf)> (2018).
- 6 Chen, X. The reason and influence of "Plastic resource recycling Strategy" formulated by Japan. *Japanese research* **33**, 29-41 (2019).
- 7 US EPA. Municipal Solid Waste in the United States: 2009 Facts and Figures, <<https://archive.epa.gov/epawaste/nonhaz/municipal/web/pdf/msw2009rpt.pdf>> (2010).
- 8 *Plastics: Material-Specific Data*, <<https://www.epa.gov/facts-and-figures-about-materials-waste-and-recycling/plastics-material-specific-data>> (2018).
- 9 Agency, U. S. E. P. Advancing Sustainable Materials Management: 2017 Fact Sheet, <[https://www.epa.gov/sites/production/files/2019-11/documents/2017\\_facts\\_and\\_figures\\_fact\\_sheet\\_final.pdf](https://www.epa.gov/sites/production/files/2019-11/documents/2017_facts_and_figures_fact_sheet_final.pdf)> (2019).
- 10 PlasticsEurope. *Plastics- the Facts 2018. An analysis of European plastics production, Demand and waste data*, <[https://www.plasticseurope.org/application/files/6315/4510/9658/Plastics\\_the\\_facts\\_2018\\_AF\\_web.pdf](https://www.plasticseurope.org/application/files/6315/4510/9658/Plastics_the_facts_2018_AF_web.pdf)> (2019).
- 11 PlasticsEurope. *Plastics - the Facts 2017. an Analysis of European Plastics Production, Demand and Waste Data*, <[https://www.plasticseurope.org/application/files/1715/2111/1527/Plastics\\_the\\_facts\\_2017\\_FINAL\\_for\\_website.pdf](https://www.plasticseurope.org/application/files/1715/2111/1527/Plastics_the_facts_2017_FINAL_for_website.pdf)> (2018).
- 12 PlasticsEurope. *Plastics - the Facts 2019. an Analysis of European Plastics Production, Demand and Waste Data*, <[https://www.plasticseurope.org/download\\_file/force/3183/181](https://www.plasticseurope.org/download_file/force/3183/181)> (2020).
- 13 Bureecam, C., Chaisomphob, T. & Sungsomboon, P.-Y. MATERIAL FLOWS ANALYSIS OF PLASTIC IN THAILAND. *Thermal Science* **22**, 2379-2388, doi:10.2298/tsci160525005b (2018).
- 14 Jambeck, J. R. *et al.* Plastic waste inputs from land into the ocean. *Science* **347**, 768-771, doi:10.1126/science.1260352 (2015).
- 15 Ecorea. *Environmental Review 2015, Korea*. (2015).
- 16 OECD. *Environment at a Glance 2015*, <<https://www.oecd-ilibrary.org/docserver/9789264235199-14-en.pdf?expires=1558966649&id=id&accname=ocid195144&checksum=77371589C72D2919DC3E6C2EA4062FAB>> (2015).
